# Supplementary material for: Evidence for widespread thermal acclimation of canopy photosynthesis
Source: PubMed Central journal article supplement — Nat Plants. 2024 Nov 8;10(12):1919–27. doi: 10.1038/s41477-024-01846-1 (PMC11649563; doi:10.1038/s41477-024-01846-1), 2024-11-08
Supplement: 41477_2024_1846_MOESM1_ESM.pdf [file 41477_2024_1846_MOESM1_ESM.pdf]

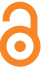

---

# Evidence for widespread thermal acclimation of canopy photosynthesis

---

In the format provided by the authors and unedited

1 Evidence for widespread thermal acclimation of canopy photosynthesis

2  
3 Jiangong Liu<sup>1\*</sup>, Youngryel Ryu<sup>1,2\*</sup>, Xiangzhong Luo<sup>3</sup>, Benjamin Dechant<sup>1,4,5</sup>, Benjamin D.  
4 Stocker<sup>6,7</sup>, Trevor F. Keenan<sup>8,9</sup>, Pierre Gentine<sup>10,11</sup>, Xing Li<sup>1</sup>, Bolun Li<sup>1,12</sup>, Sandy P. Harrison<sup>13,14</sup>,  
5 Iain Colin Prentice<sup>14,15</sup>

6  
7 <sup>1</sup> Research Institute of Agriculture and Life Sciences, Seoul National University, Seoul, Republic  
8 of Korea

9 <sup>2</sup> Department of Landscape Architecture and Rural Systems Engineering, Seoul National  
10 University, Seoul, Republic of Korea

11 <sup>3</sup> Department of Geography, National University of Singapore, 1 Arts Link, Singapore 117570

12 <sup>4</sup> German Centre for Integrative Biodiversity Research (iDiv) Halle-Jena-Leipzig, Leipzig,  
13 Germany

14 <sup>5</sup> Leipzig University, Leipzig, Germany

15 <sup>6</sup> Institute of Geography, University of Bern, Bern, Switzerland

16 <sup>7</sup> Oeschger Centre for Climate Change Research, University of Bern, Bern, Switzerland

17 <sup>8</sup> Climate and Ecosystem Sciences Division, Lawrence Berkeley National Laboratory, 1  
18 Cyclotron Road, Berkeley, CA 94720, USA

19 <sup>9</sup> Department of Environmental Science, Policy, and Management, University of California,  
20 Berkeley, CA 94720, USA

21 <sup>10</sup> Earth and Environmental Engineering Department, Columbia University, New York, NY  
22 10027, USA

23 <sup>11</sup> Climate School, Columbia University, New York, NY 10025, USA

24 <sup>12</sup> School of Geographical Sciences, Nanjing University of Information Science and Technology,  
25 Nanjing 210044, China

26 <sup>13</sup> School of Archaeology, Geography and Environmental Science (SAGES), University of  
27 Reading, Reading RG6 6AH, United Kingdom

28 <sup>14</sup> Department of Earth System Science, Ministry of Education Key Laboratory for Earth System  
29 Modeling, Institute for Global Change Studies, Tsinghua University, Beijing 100084, China

30 <sup>15</sup> Georgina Mace Centre for the Living Planet, Department of Life Sciences, Imperial College  
31 London, Silwood Park Campus, Buckhurst Road, Ascot SL5 7PY, United Kingdom

32  
33  
34 \*Corresponding author: Jiangong Liu ([jl6314@columbia.edu](mailto:jl6314@columbia.edu)); Youngryel Ryu ([yryu@snu.ac.kr](mailto:yryu@snu.ac.kr))  
35

36 The SI contains 2 Supplementary Text, 3 Supplementary Tables, 9 Supplementary Figures, and  
37 Supplementary References.

38  
39

40 **Supplementary Text 1. Farquhar-von Caemmerer-Berry model (FvCB) for estimating CO<sub>2</sub>**  
41 **assimilation rate**

42 We employ the standard FvCB model<sup>1</sup>, which comprises the photosynthetic module of the  
43 Breathing Earth System Simulator (BESS)<sup>2,3</sup>, to estimate the canopy-scale CO<sub>2</sub> assimilation rate  
44 ( $A$ ) of C<sub>3</sub> plants in a big-leaf framework. Within the big-leaf framework, we assume the canopy  
45 functions as a single bulk plane that serves as the source and sink for all mass and energy fluxes<sup>4</sup>.  
46 The model determines  $A$  based on the slower rate of two biochemical processes:  $A_j$ , which is the  
47 electron transport for ribulose-1,5-bisphosphate (RuBP) at low light and is dependent on the  
48 capacity of the electron transport chain ( $J_{max}$ ;  $\mu\text{mol m}^{-2} \text{s}^{-1}$ ), and  $A_c$ , which is the carboxylation of  
49 RuBP and is dependent on ribulose-1,5-bisphosphate carboxylase/oxygenase (Rubisco) activities  
50 ( $V_{cmax}$ ;  $\mu\text{mol m}^{-2} \text{s}^{-1}$ ). Both  $A_j$  and  $A_c$  are influenced by intercellular CO<sub>2</sub> concentrations ( $C_i$ ). For  
51 non-optimality-based BESS versions (i.e., BESS<sub>PFT</sub> and BESS<sub>LAI</sub>), we assume a fixed ratio of  $C_i$   
52 to the ambient CO<sub>2</sub> concentration ( $C_a$ ), which is referred to as  $\chi$  and set at 0.7<sup>5</sup>. The eco-  
53 evolutionary optimality (EEO) theory suggests that plants tend to maximize carbon gain and  
54 minimize water loss by regulating stomatal conductance, which results in an optimal  $\chi$  value<sup>6</sup>.  
55 We use optimal  $\chi$  for optimality-based BESS (BESS<sub>EEO</sub>) (Supplementary Text 2).

$$56 \quad A_j = \frac{\alpha I J_{max}}{\alpha I + 2.1 J_{max}} \frac{(C_i - \Gamma^*)}{4(C_i + 2\Gamma^*)} \quad (1)$$

$$57 \quad A_c = \frac{V_{cmax}(C_i - \Gamma^*)}{C_i + K_c \left(1 + \frac{O}{K_o}\right)} \quad (2)$$

$$58 \quad A = \min(A_c, A_j) \quad (3)$$

59 where  $I$  ( $\mu\text{mol photons m}^{-2} \text{s}^{-1}$ ) is incident photosynthetically photon flux density,  $\alpha$  ( $\text{mol mol}^{-1}$ )  
60 is the intrinsic quantum yield based on incident light,  $\Gamma^*$  (Pa) is the CO<sub>2</sub> compensation point in  
61 the absence of dark respiration,  $O$  (Pa) is oxygen partial pressure, and  $K_c$  (Pa) and  $K_o$  (Pa) are  
62 Michaelis-Menten constants of Rubisco for CO<sub>2</sub> and O<sub>2</sub>, respectively<sup>7</sup>.

63  
64 In this study, we integrate the parameters characterizing acclimation and adaptation following  
65 ref<sup>8</sup> into the BESS code. An Arrhenius function is used to describe the temperature dependencies  
66 of  $V_{cmax}$  and  $J_{max}$  for the baseline BESS<sup>9</sup>:

67 
$$k = k^{25C} \times \exp \left[ \frac{H_a \times 1000 \times (T - 298.15)}{298.15 \times R \times T} \right] \times \frac{\left[ 1 + \exp \left( \frac{298.15 \times S - H_d}{298.15 \times R} \right) \right]}{\left[ 1 + \exp \left( \frac{S \times T - H_d}{R \times T} \right) \right]} \quad (4)$$

68 where  $k^{25C}$  represents  $V_{cmax}^{25C}$  and  $J_{max}^{25C}$ , and R is the universal gas constant (8.31 J K<sup>-1</sup> mol<sup>-1</sup>). T is  
 69 the canopy temperature in °K. H<sub>a</sub>, H<sub>d</sub> and S are activation energy (kJ mol<sup>-1</sup>), deactivation energy  
 70 fixed at 200 kJ mol<sup>-1</sup>, and entropy factor (kJ mol<sup>-1</sup> K<sup>-1</sup>), respectively.

71  
 72 We use three empirical approaches to estimate  $V_{cmax}$  variants at a reference temperature of 25 °C  
 73 ( $V_{cmax}^{25C}$ ) (see Methods), and calculate  $J_{max}^{25C}$  as a function of  $V_{cmax}^{25C}$ , home temperature ( $T_{home}$ , °C)  
 74 and growth temperature ( $\overline{T_{avr}}$ , °C)<sup>8</sup>. Here,  $T_{home}$  is defined as the average air temperature of the  
 75 warmest month over the measurement period following ref<sup>10</sup>. The values of H<sub>a</sub> and S are  
 76 estimated as functions of  $\overline{T_{avr}}$  and  $T_{home}$  to account for acclimation, with a general form as:

77 
$$H_a \text{ or } S = a\overline{T_{avr}} + bT_{home} + c(\overline{T_{avr}} - T_{home}) + d \quad (5)$$

78 where parameters a, b, c and d are set, following refs<sup>8,10</sup> and can be found in Supplementary  
 79 Table 2. T represents a key source of uncertainties in canopy-scale photosynthetic modelling<sup>10</sup>.

80 We test three approaches to estimate T, which assume that T is equivalent to either the air  
 81 temperature ( $T_{air}$ , °K), the aerodynamic surface temperature ( $T_{aero}$ , °K), or the radiometric  
 82 surface temperature of the big-leaf plane ( $T_{rad}$ , °K).  $T_{aero}$  is calculated as follows:

83 
$$T_{aero} = T_{air} + \frac{H}{\rho G_{ah} c_p} \quad (6)$$

84 where H is the sensible heat flux (W m<sup>-2</sup>), ρ is the air density (kg m<sup>-3</sup>), G<sub>ah</sub> is the aerodynamic  
 85 conductance to heat transfer (m s<sup>-1</sup>), and C<sub>p</sub> is the heat capacity of dry air (J K<sup>-1</sup> kg<sup>-1</sup>). G<sub>ah</sub> is  
 86 calculated as the sum of aerodynamic conductance to momentum transfer<sup>11</sup> and canopy boundary  
 87 layer conductance to heat transfer<sup>12</sup>.  $T_{rad}$  is calculated based on the physical principle that the  
 88 longwave radiation emitted by an object is proportional to the fourth power of the object's  
 89 temperature, stated by the Stephan-Boltzmann law:

90 
$$T_{rad} = \left( \frac{LW_{out} - (1 - \epsilon)LW_{in}}{\sigma \epsilon} \right)^{\frac{1}{4}} \quad (7)$$

91 where LW<sub>out</sub> and LW<sub>in</sub> are the outgoing and incoming longwave radiation (W m<sup>-2</sup>), respectively.  
 92 σ denotes the Stefan-Boltzmann constant (W m<sup>-2</sup> K<sup>-4</sup>). We set the emissivity of the surface, ε, to  
 93 0.98. We compute  $T_{aero}$  and  $T_{rad}$  with R package bigleaf<sup>4</sup>. Note that the data availability for  $T_{rad}$

94 and  $T_{\text{aero}}$  data is less than that for  $T_{\text{air}}$ , as their calculation depends on several variables (equation  
 95 6 and 7). This is particularly significant given that  $LW_{\text{out}}$  and  $LW_{\text{in}}$  are available for only about  
 96 74% of the sites. The estimated  $T_{\text{aero}}$  and  $T_{\text{rad}}$  show strong correlations with  $T_{\text{air}}$ , with  $R^2$  values  
 97 of  $0.93 \pm 0.10$  and  $0.78 \pm 0.15$  (mean  $\pm 1$ -SD, model:  $T_{\text{air}} \sim T_{\text{aero}}$  or  $T_{\text{rad}}$ ) over FLUXNET2015  
 98 sites. In theory,  $T_{\text{rad}}$  and  $T_{\text{aero}}$  should more closely approximate the true canopy temperature ( $T$ )  
 99 than  $T_{\text{air}}$ , potentially leading to better model performance when using them as  $T$  approximations.  
 100 However, the three  $T$  approximations (i.e.,  $T_{\text{air}}$ ,  $T_{\text{aero}}$  and  $T_{\text{rad}}$ ) yield highly similar results when  
 101 estimating hourly  $A$  (Supplementary Fig. 8). It is important to note that eddy covariance GPP  
 102 data are not independent of  $T_{\text{air}}$ , since both daytime and nighttime partitioning methods use  $T_{\text{air}}$   
 103 as an input<sup>13</sup>. This likely explains the comparable modelling performance between  $T_{\text{air}}$  and the  
 104 other two  $T$  approximations. We finally choose  $T_{\text{air}}$  over  $T_{\text{aero}}$  and  $T_{\text{rad}}$  because the data are more  
 105 frequently available. Detailed descriptions of other processes of the FvCB model in BESS and  
 106 BESS's performance in estimating GPP over flux sites are given in refs<sup>2,3,9</sup>.

107

## 108 **Supplementary Text 2. EEO-based estimate of leaf photosynthetic capacity**

109

110 The coordination hypothesis posits that leaf  $A_c$  (equation 2) tends to be equal to  $A_j$  (equation 1)  
 111 over intermediate time scales, meaning that photosynthesis operates at a co-limitation point of  $A_c$   
 112 and  $A_j$ <sup>14,15</sup>. We apply the findings from this study on PFT-dependent optimal time scales for  
 113 acclimation (Fig. 2) to represent the growth conditions of plants. To account for the effect of  
 114 finite  $J_{\text{max}}$ <sup>6,16</sup>, we modify equation (1) using a non-rectangular hyperbola function<sup>17</sup>:

$$115 \quad A_j = \frac{\alpha I}{\sqrt{1 + \left(\frac{\alpha I}{J_{\text{max}}}\right)^2}} \frac{(C_i - \Gamma^*)}{(C_i + 2\Gamma^*)} \quad (8)$$

$$116 \quad \alpha = \frac{a_L b_L}{4} \Phi_{\text{PSII,max}} M \quad (9)$$

117 where  $a_L = 0.8$  represents the leaf absorptance,  $b_L = 0.5$  represents the fraction of absorbed light  
 118 for photosystem II (PSII), and the factor 4 accounts for the number of electron equivalents  
 119 required to assimilate one  $\text{CO}_2$  molecule. The constant  $M = 12$  (g) represents the weight of 1 mol  
 120 carbon.  $\Phi_{\text{PSII,max}}$  represents the maximum quantum yield of PSII for a representative light-  
 121 adapted leaf, and is dependent on  $T$ <sup>18</sup>:

122 
$$\Phi_{PSII,max} = 0.352 + 0.022T - 0.00034T^2 \quad (10)$$

123 The least-cost theory proposes that plants can optimize  $\chi$  by minimizing the combined unit costs  
 124 per carbon assimilation of maintaining carbon assimilation and water transpiration (E)<sup>19</sup>:

125 
$$e \frac{\partial(E/A)}{\partial\chi} = -f \frac{\partial(V_{cmax}/A)}{\partial\chi} \quad (11)$$

126 where e and f (unitless) are the unit costs for E and A, respectively. One optimal  $\chi$  value can be  
 127 resolved from equation (10) through an application of Fick's law of diffusion for H<sub>2</sub>O and CO<sub>2</sub><sup>19</sup>:

128 
$$\chi = \frac{\sqrt{\beta \frac{K + \Gamma^*}{1.6\eta^*} + \frac{\Gamma^* \sqrt{VPD}}{C_a}}}{\sqrt{\beta \frac{K + \Gamma^*}{1.6\eta^*} + \sqrt{VPD}}} \quad (12)$$

129 where VPD (Pa) is the vapor pressure deficit, and K (Pa) is the effective Michaelis-Menten  
 130 coefficient of Rubisco<sup>20</sup>.  $\eta^*$  (Pa s), which represents the viscosity of water at 25 °C, can be  
 131 estimated using a T dependence function<sup>6</sup>. The parameter  $\beta$  is the ratio of the unit costs a and b  
 132 (equation 9) when standardized to their values at 25 °C, and is fixed at 146 based on an updated  
 133 isotope-derived  $\chi$  database<sup>6,16</sup>.

134  
 135 Furthermore, we assume that the optimal  $J_{max}$  value maximizes the difference between carbon  
 136 gain ( $A_j$ ) and the cost of  $c \times J_{max}$ , where c (unitless) is a cost factor. We estimate c to be 0.103  
 137 based on a typical value of  $J_{max}/V_{cmax} = 1.88$ <sup>6,21</sup>. By establishing an equivalence between  
 138 equations (2) and (7), we can solve for an EEO-based leaf-scale  $V_{cmax}$  value ( $V_{cmax\_EEO}$ ):

139 
$$V_{cmax\_EEO} = \alpha I \frac{C_i + K}{C_i + 2\Gamma^*} \sqrt{1 - \left[ \frac{4c(C_i + 2\Gamma^*)}{C_i - \Gamma^*} \right]^{\frac{2}{3}}} \quad (13)$$

140 For the seasonally-fixed  $V_{cmax}^{25C}$  ( $V_{cmax\_PFT}^{25C}$ ) and phenology-based  $V_{cmax}^{25C}$  ( $V_{cmax\_LAI}^{25C}$ ), they are  
 141 derived for the top leaves. When calculating  $V_{cmax\_EEO}^{25C}$ , we assume a fraction of 1 for absorbed  
 142 photosynthetically active radiation to represent leaves located at the top of a canopy. This  
 143 assumption ensures consistency in the derivation of canopy  $V_{cmax}^{25C}$  among the three BESS  
 144 variants.

145

146 To convert top-leaf  $V_{cmax}^{25C}$  ( $V_{cmax,top}^{25C}$ ) to representative-leaf  $V_{cmax}^{25C}$  ( $V_{cmax,ave}^{25C}$ ), we use a satellite-  
147 based clumping index ( $k_n$ , unitless) derived from a global map<sup>22</sup>, which indicates the non-  
148 randomness of leaf distribution<sup>7</sup>:

$$149 \quad V_{cmax,ave}^{25C} = V_{cmax,top}^{25C} \times \frac{1 - e^{-k_n}}{k_n} \quad (14)$$

150 We calculate canopy-scale representative  $V_{cmax}^{25C}$  ( $V_{cmax,canopy}^{25C}$ ) following:

$$151 \quad V_{cmax,canopy}^{25C} = V_{cmax,ave}^{25C} \times LAI \quad (15)$$

152 Detailed deduction of  $V_{cmax\_EEO}$  can be found in ref<sup>23</sup>. Additionally, we test the sensitivity of  
153  $V_{cmax\_EEO}^{25C}$  to the selection of the time scale for acclimation ( $\tau$ ) by examining its relative change  
154 when setting  $\tau = 14$  days compared to other  $\tau$  values (Supplementary Fig. 9). Overall,  $V_{cmax\_EEO}^{25C}$   
155 changes by  $0.17 \pm 2.59 \%$ ,  $0.28 \pm 1.37 \%$ ,  $0.14 \pm 0.78 \%$ ,  $0.01 \pm 0.85 \%$ ,  $0.37 \pm 1.79 \%$  and  $1.34$   
156  $\pm 3.01 \%$  (mean  $\pm 1$ -SD) across flux sites when  $\tau$  is set to 3, 7, 10, 20, 30 and 45 days,  
157 respectively. This finding indicates that  $\tau$  has a relatively limited impact on  $V_{cmax\_EEO}^{25C}$   
158 estimation, particularly when  $\tau$  is selected within the range of 7 to 30 days, a period commonly  
159 used in previous studies<sup>23-25</sup>.

160

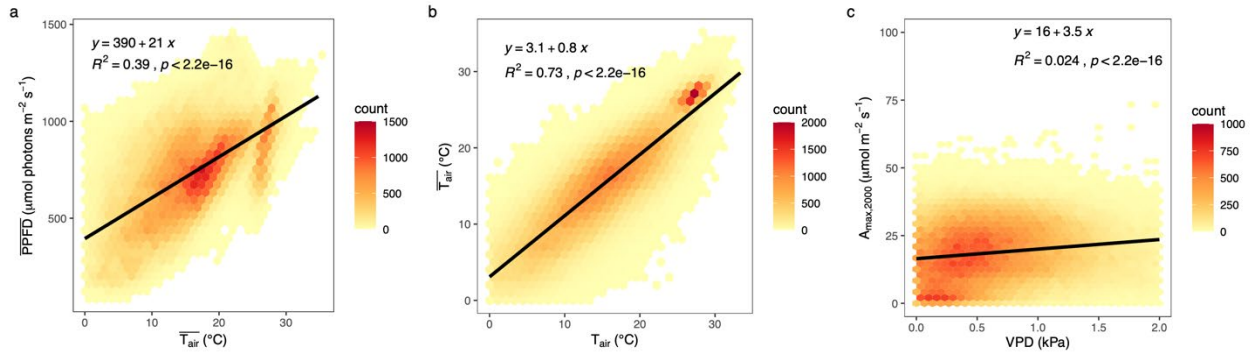

161  
 162 **Supplementary Fig. 1: Relationships among environmental variables and  $A_{max,2000}$ .** a–c, The  
 163 relationships between  $\overline{T_{air}}$  and  $\overline{PPFD}$  (a), between  $\overline{T_{air}}$  and  $T_{air}$  (b) and between  $A_{max,2000}$  and  
 164 VPD (c). Black lines represent linear fits ( $Y \sim X$ ).  
 165



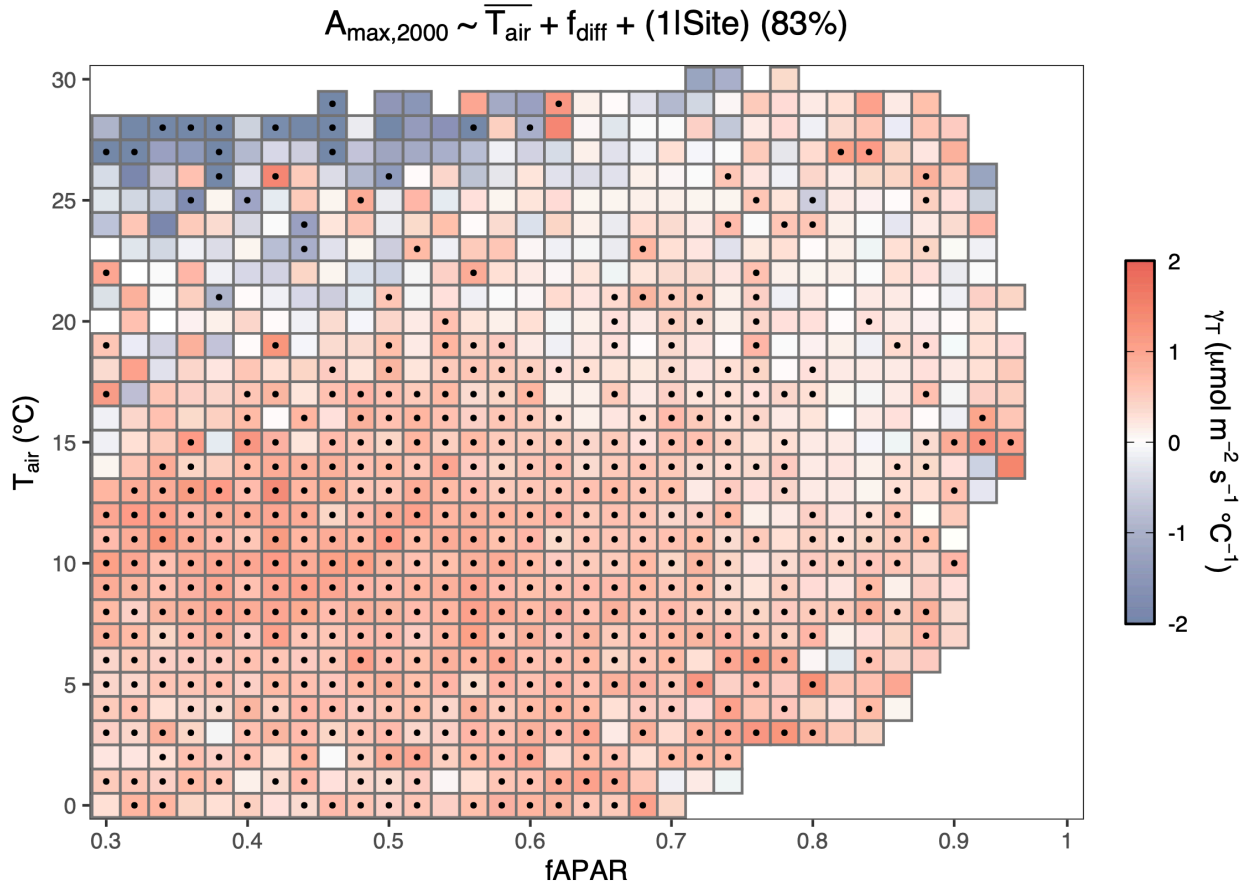

166  
 167  
 168  
 169  
 170  
 171  
 172  
 173  
 174

**Supplementary Fig. 2: The partial effect of  $\overline{T_{avr}}$  on  $A_{\max,2000}$  over fAPAR and  $T_{\text{air}}$  bins.** Diffuse fraction ( $f_{\text{diff}}$ ) is incorporated in the modelling ( $A_{\max,2000} \sim \overline{T_{avr}} + f_{\text{diff}} + (1 | \text{Site})$ ). Site-level  $f_{\text{diff}}$  is estimated by an artificial neural network model<sup>26</sup>, due to limited data availability of observed  $f_{\text{diff}}$ . Numbers (%) in parentheses represent the detectability of positive partial correlation coefficients, which is defined as the percentage of the number of bins displaying a positive partial correlation coefficient over the total number of bins. Black dots indicate significant (two-sided,  $P < 0.05$ ) correlations.

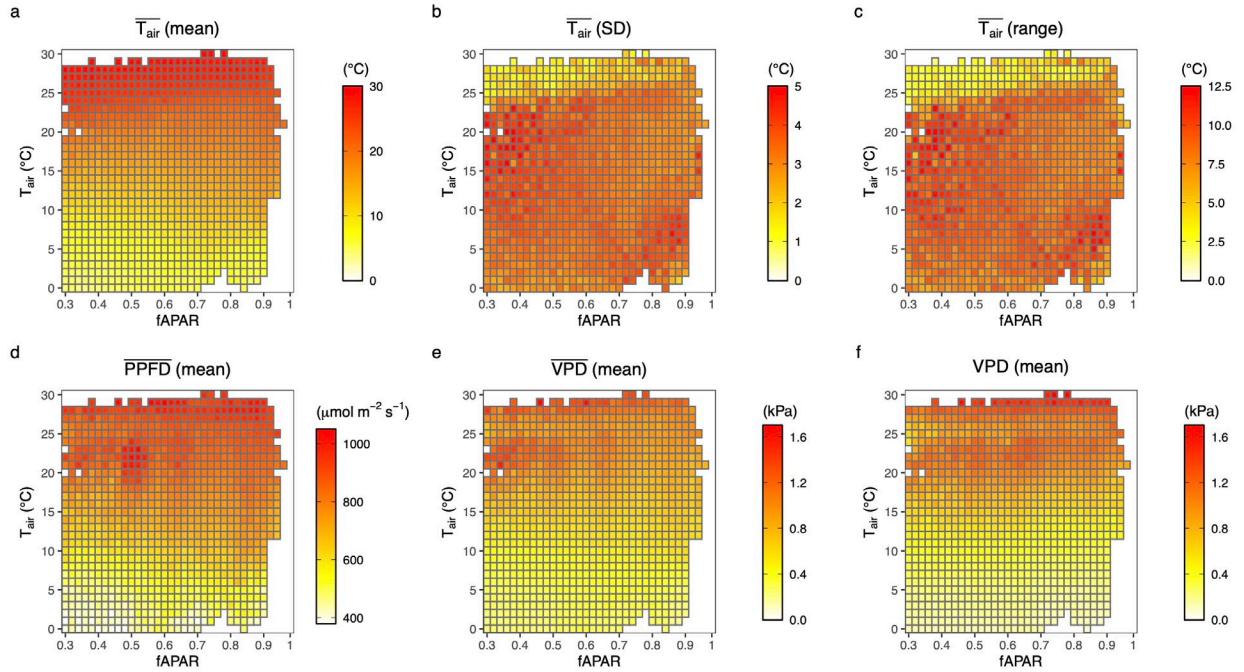

175  
 176 **Supplementary Fig. 3: Averages (mean), standard deviations (SD) and ranges of**  
 177 **environmental variables in the fPAR-T<sub>air</sub> bin pairs for the cross-site analysis. a–c, The mean**  
 178 **(a), SD (b) and range (c) of  $\overline{T_{air}}$  (°C), d, the mean of  $\overline{PPFD}$  (μmol m<sup>-2</sup> s<sup>-1</sup>), and e–f, the mean of**  
 179  **$\overline{VPD}$  (kPa) and VPD (kPa) in each fPAR-T<sub>air</sub> bin pair.**

180  
 181

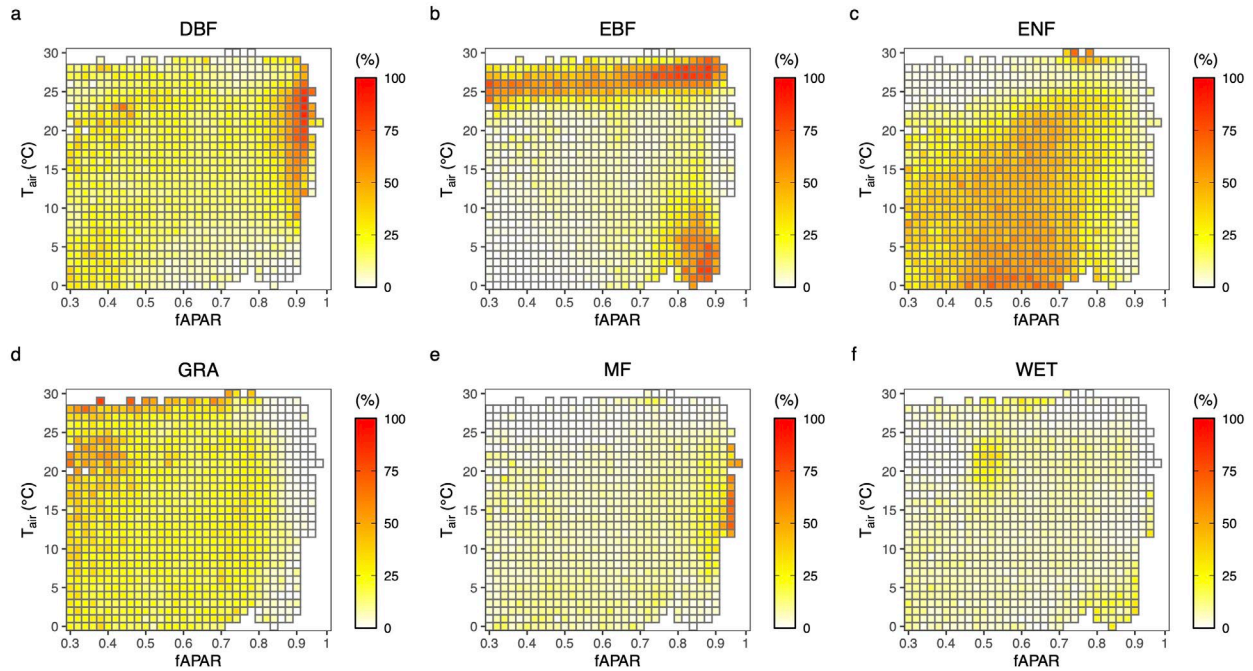

182  
 183 **Supplementary Fig. 4: Percentage of each plant functional type (PFT) in fPAR-T<sub>air</sub> bin**  
 184 **pairs for the cross-site analysis. a–f, The ratio (%) of the number of each PFT to the total**  
 185 **sampling number in each fPAR-T<sub>air</sub> bin pair, for deciduous broadleaf forests (DBF) (a),**  
 186 **evergreen broadleaf forests (EBF) (b), evergreen needle-leaf forests (ENF) (c), grasslands**  
 187 **(GRA) (d), mixed forests (MF) (e), and wetlands (WET) (f).**

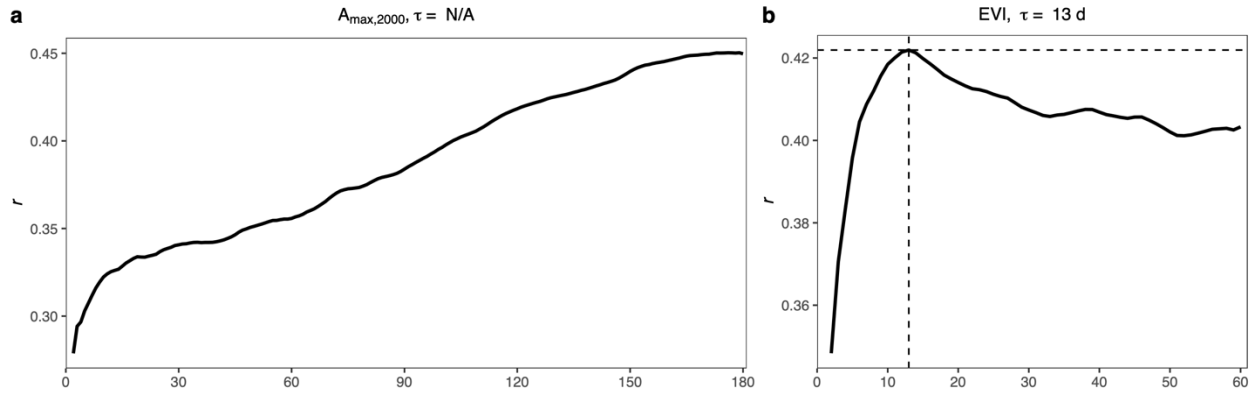

188  
 189 **Supplementary Fig. 5: Responses of the 5-d moving average of correlation ( $r$ ) between**  
 190 **photosynthetic capacity metrics and  $\overline{T_{air}}$  to the number of days used for averaging daytime**  
 191  **$T_{air}$  for evergreen broadleaf forests (EBF). a-b,  $A_{max,2000}$  (a) and enhanced vegetation index**  
 192 **(EVI) (b) are used to indicate canopy photosynthetic capacity. Daily EVI for each EBF flux site**  
 193 **is derived from MODIS MCD43A4.**  
 194

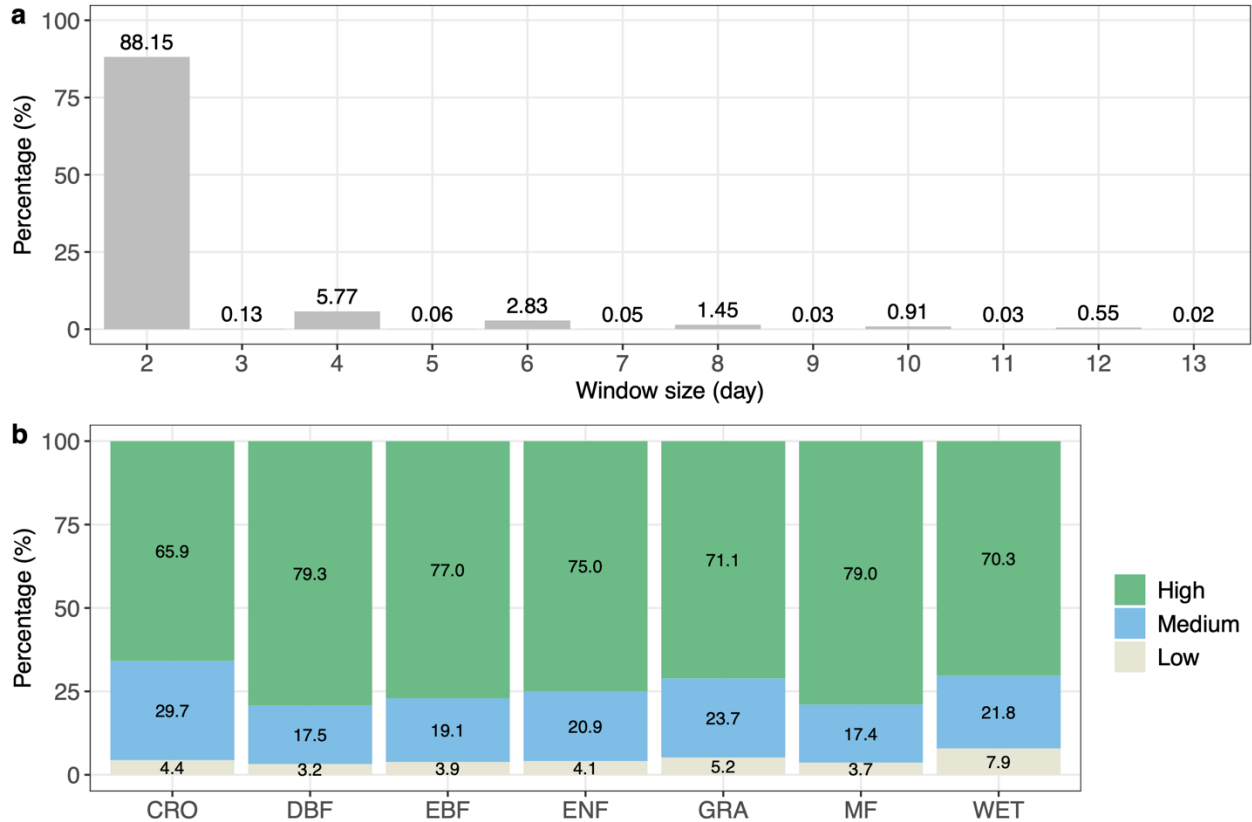

195  
 196 **Supplementary Fig. 6: Percentages of window sizes (a) and quality flags (b) for the fitted**  
 197 **light response curves.** A "low" quality flag indicates that curve fitting cannot be well  
 198 constrained with the available data within 14 days. A "medium" quality flag means the curve  
 199 fitting can be constrained but the fitting parameters show unreasonable ranges. A "high" quality  
 200 flag indicates that the curve fitting is well-constrained and the fitting parameters are within  
 201 reasonable ranges. The reasonable range for each parameter is provided in ref.<sup>27</sup>.  
 202

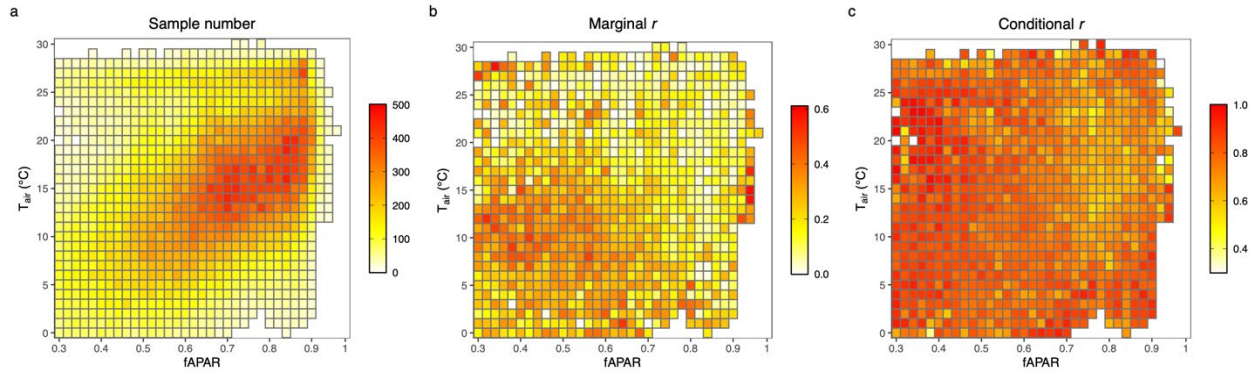

203  
 204 **Supplementary Fig. 7: Statistical metrics for the cross-site analysis. a–c,** The sampling  
 205 number **(a)**, marginal correlation coefficient (marginal  $r$ ) **(b)**, and conditional correlation  
 206 coefficient (conditional  $r$ ) **(c)** for the cross-site analysis using linear mix-effect models ( $A_{\max,2000}$   
 207  $\sim \overline{T_{air}} + (1 | \text{Site})$ ).  
 208

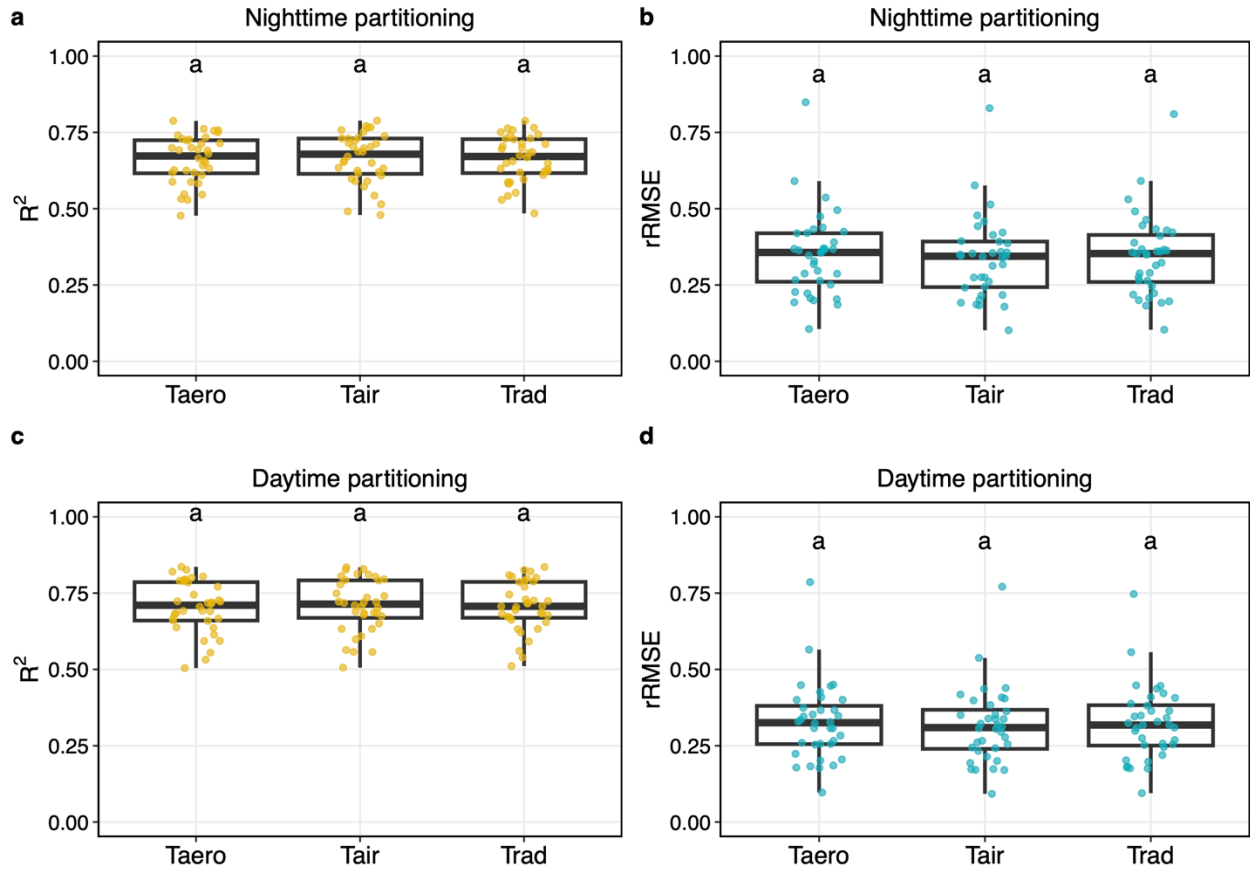

209  
 210 **Supplementary Fig. 8: Comparison of model performance in estimating hourly GPP using**  
 211 **three temperature approximations. a–d,** Model performance is evaluated based on the  
 212 coefficient of determination ( $R^2$ , golden yellow) and GPP partitioned by the nighttime (a) and  
 213 daytime (c) methods, as well as relative root mean square error (rRMSE, teal) and GPP  
 214 partitioned by the nighttime (b) and daytime (d) methods. The temperature approximations  
 215 include aerodynamic surface temperature ( $T_{aero}$ ), air temperature ( $T_{air}$ ), and radiometric surface  
 216 temperature ( $T_{rad}$ ). In the box plots, the central lines represent the median values, the upper and  
 217 lower box limits represent the 75th and 25th percentiles, and the upper and lower whiskers  
 218 extend to 1.5 times the interquartile range, respectively. Identical letters indicate no statistically  
 219 significant differences between the average values of the metrics, according to Tukey’s HSD test  
 220 (two-sided,  $P > 0.05$ ). The analysis includes only non-cropland, non-dryland,  $C_3$  sites with  
 221 acceptable performance (see Supplementary Table 2) and with available data for incoming and  
 222 outgoing longwave radiation needed for  $T_{rad}$  calculations ( $n = 36$ ).  
 223

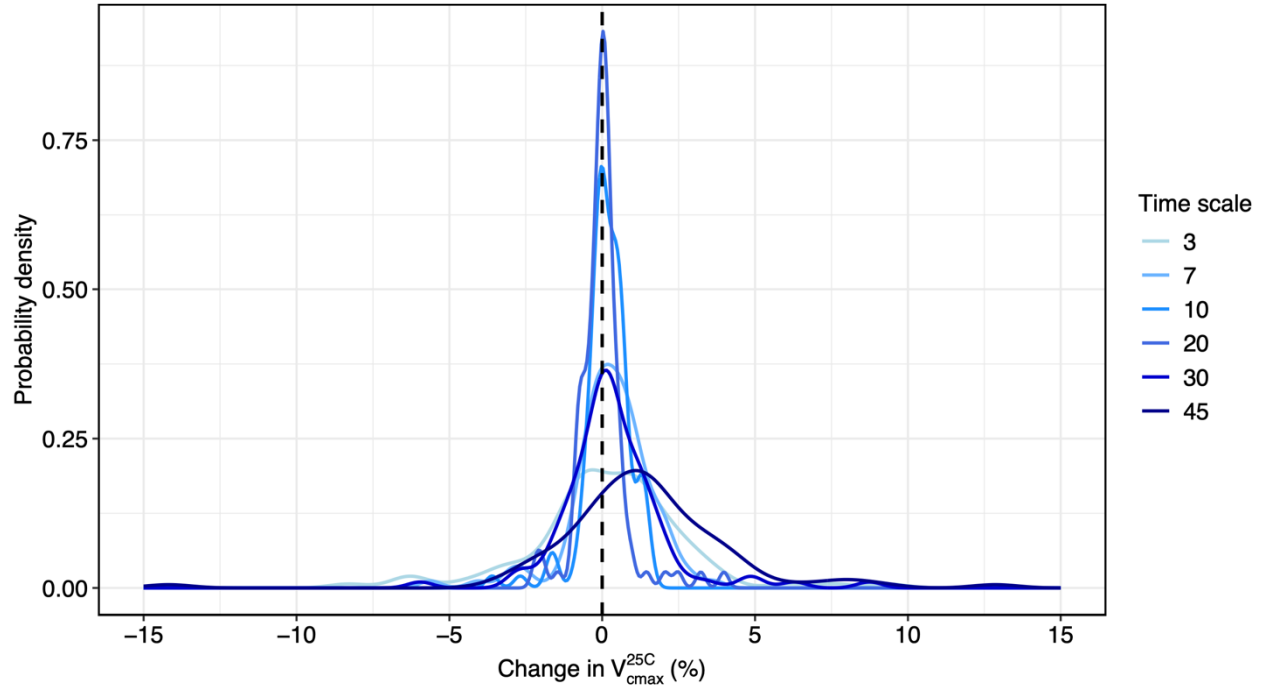

224  
225  
226  
227  
228  
229

**Supplementary Fig. 9: Relative change in  $V_{cmax}^{25C}$  estimated using a 14-day time scale for acclimation compared to other time scales.** The probability density function for the relative change in  $V_{cmax}^{25C}$  is estimated using kernel density estimation, based on data from 105 long-term (observational length greater than three years), non-cropland, and C<sub>3</sub> sites.



230 **Supplementary Table 1: Relationships between the site-level observed diffuse fraction and**  
 231  **$\overline{T_{avr}}$  for the flux sites where diffuse PAR and direct PAR are available.** The diffuse fraction  
 232 is calculated as the ratio of diffuse PAR to the sum of diffuse and direct PAR. The relationship  
 233 between the diffuse fraction and  $\overline{T_{avr}}$  is modelled as a linear function (diffuse fraction  $\sim \overline{T_{avr}}$ ).  
 234 Diffuse fraction and  $\overline{T_{avr}}$  show a significant positive relationship at only one of the 41 sites.  
 235

| Site   | IGBP <sup>a</sup> | slope     | R <sup>2</sup> | p-value |
|--------|-------------------|-----------|----------------|---------|
| AT-Neu | GRA               | -0.0033   | 0.0295         | < 0.05  |
| BE-Bra | MF                | -0.0031   | 0.0293         | < 0.05  |
| CA-Gro | MF                | -0.0022   | 0.0198         | < 0.05  |
| CA-Obs | ENF               | 8.00E-04  | 0.0029         | < 0.05  |
| CA-Qfo | ENF               | -0.0013   | 0.0062         | < 0.05  |
| CG-Tch | SAV               | -0.0242   | 0.1631         | < 0.05  |
| CH-Oe1 | GRA               | -6.00E-04 | 0.001          | > 0.05  |
| CH-Oe2 | CRO               | 3.00E-04  | 3.00E-04       | > 0.05  |
| CZ-BK1 | ENF               | -0.0029   | 0.016          | < 0.05  |
| CZ-BK2 | GRA               | -0.0042   | 0.0139         | > 0.05  |
| DE-Geb | CRO               | -0.0065   | 0.0869         | < 0.05  |
| DE-Hai | DBF               | -0.0085   | 0.1278         | < 0.05  |
| DE-Tha | ENF               | -0.003    | 0.0455         | < 0.05  |
| ES-Ln2 | OSH               | 1.00E-04  | 0.003          | > 0.05  |
| FI-Hyy | ENF               | -0.0017   | 0.0129         | < 0.05  |
| FI-Lom | WET               | -0.3004   | 0.0167         | < 0.05  |
| FR-Gri | CRO               | -0.005    | 0.0938         | < 0.05  |
| FR-LBr | ENF               | -0.0036   | 0.0416         | < 0.05  |
| FR-Pue | EBF               | -0.0045   | 0.0568         | < 0.05  |
| GF-Guy | EBF               | -0.0622   | 0.1985         | < 0.05  |
| GH-Ank | EBF               | -0.0237   | 0.318          | < 0.05  |
| IT-BCi | CRO               | -0.0073   | 0.1796         | < 0.05  |
| IT-Col | DBF               | -0.0055   | 0.0817         | < 0.05  |
| IT-MBo | GRA               | -0.0019   | 0.0076         | < 0.05  |
| IT-PT1 | DBF               | 0.0064    | 0.0126         | > 0.05  |
| IT-Ro2 | DBF               | -0.0068   | 0.1393         | < 0.05  |
| IT-SR2 | ENF               | -0.008    | 0.1565         | < 0.05  |
| IT-SRo | ENF               | -0.0055   | 0.1152         | < 0.05  |
| NL-Loo | ENF               | -0.0046   | 0.0915         | < 0.05  |
| RU-Ha1 | GRA               | -0.008    | 0.2058         | < 0.05  |
| US-Me1 | ENF               | -0.0046   | 0.0407         | < 0.05  |
| US-Me2 | ENF               | -0.0064   | 0.0938         | < 0.05  |
| US-MMS | DBF               | -0.0027   | 0.0375         | < 0.05  |
| US-Ne1 | CRO               | -0.0023   | 0.0341         | < 0.05  |
| US-Ne2 | CRO               | -0.0017   | 0.0193         | < 0.05  |
| US-Ne3 | CRO               | -0.0019   | 0.024          | < 0.05  |
| US-Syv | MF                | -0.0037   | 0.055          | < 0.05  |
| US-UMB | DBF               | -0.0042   | 0.075          | < 0.05  |
| US-UMd | DBF               | -0.0031   | 0.0415         | < 0.05  |
| US-Var | GRA               | -0.0069   | 0.1031         | < 0.05  |
| US-WCr | DBF               | 8.00E-04  | 0.001          | > 0.05  |

236 <sup>a</sup>The land cover classification defined by The International Geosphere–Biosphere Programme  
 237 (IGBP) (definitions are as in Fig. 2)  
 238

**Supplementary Table 2: Site information of the FLUXNET2015 database**

| Site   | Latitude   | Longitude  | IGBP <sup>a</sup> | Period    | Model <sup>b</sup> | DOI                  |
|--------|------------|------------|-------------------|-----------|--------------------|----------------------|
| AR-SLu | -33.4648   | -66.4598   | MF                | 2009-2011 | No                 | 10.18140/FLX/1440191 |
| AR-Vir | -28.2395   | -56.1886   | ENF               | 2009-2012 | No                 | 10.18140/FLX/1440192 |
| AT-Neu | 47.11667   | 11.3175    | GRA               | 2002-2012 | Yes                | 10.18140/FLX/1440121 |
| AU-Ade | -13.0769   | 131.1178   | WSA               | 2007-2009 | No                 | 10.18140/FLX/1440193 |
| AU-ASM | -22.283    | 133.249    | SAV               | 2010-2014 | No                 | 10.18140/FLX/1440194 |
| AU-Cpr | -34.0021   | 140.5891   | SAV               | 2010-2014 | No                 | 10.18140/FLX/1440195 |
| AU-Cum | -33.61518  | 150.72362  | EBF               | 2012-2014 | No                 | 10.18140/FLX/1440196 |
| AU-DaP | -14.0633   | 131.3181   | GRA               | 2007-2013 | Yes                | 10.18140/FLX/1440123 |
| AU-DaS | -14.1593   | 131.3881   | SAV               | 2008-2014 | No                 | 10.18140/FLX/1440122 |
| AU-Dry | -15.2588   | 132.3706   | SAV               | 2008-2014 | No                 | 10.18140/FLX/1440197 |
| AU-Emr | -23.8587   | 148.4746   | GRA               | 2011-2013 | No                 | 10.18140/FLX/1440198 |
| AU-Fog | -12.5452   | 131.3072   | WET               | 2006-2008 | No                 | 10.18140/FLX/1440124 |
| AU-Gin | -31.3764   | 115.7138   | WSA               | 2011-2014 | No                 | 10.18140/FLX/1440199 |
| AU-GWW | -30.1913   | 120.6541   | SAV               | 2013-2014 | No                 | 10.18140/FLX/1440200 |
| AU-How | -12.4943   | 131.1523   | WSA               | 2001-2014 | No                 | 10.18140/FLX/1440125 |
| AU-Lox | -34.4704   | 140.6551   | DBF               | 2008-2009 | Yes                | 10.18140/FLX/1440247 |
| AU-RDF | -14.5636   | 132.4776   | WSA               | 2011-2013 | No                 | 10.18140/FLX/1440201 |
| AU-Rig | -36.6499   | 145.5759   | GRA               | 2011-2014 | Yes                | 10.18140/FLX/1440202 |
| AU-Rob | -17.1175   | 145.6301   | EBF               | 2014-2014 | No                 | 10.18140/FLX/1440203 |
| AU-Stp | -17.1507   | 133.3502   | GRA               | 2008-2014 | No                 | 10.18140/FLX/1440204 |
| AU-TTE | -22.287    | 133.64     | GRA               | 2012-2014 | No                 | 10.18140/FLX/1440205 |
| AU-Tum | -35.6566   | 148.1517   | EBF               | 2001-2014 | No                 | 10.18140/FLX/1440126 |
| AU-Wac | -37.4259   | 145.1878   | EBF               | 2005-2008 | No                 | 10.18140/FLX/1440127 |
| AU-Whr | -36.6732   | 145.0294   | EBF               | 2011-2014 | No                 | 10.18140/FLX/1440206 |
| AU-Wom | -37.4222   | 144.0944   | EBF               | 2010-2014 | No                 | 10.18140/FLX/1440207 |
| AU-Ync | -34.9893   | 146.2907   | GRA               | 2012-2014 | Yes                | 10.18140/FLX/1440208 |
| BE-Bra | 51.30761   | 4.51984    | MF                | 1996-2014 | No                 | 10.18140/FLX/1440128 |
| BE-Lon | 50.55162   | 4.74623    | CRO               | 2004-2014 | No                 | 10.18140/FLX/1440129 |
| BE-Vie | 50.30493   | 5.99812    | MF                | 1996-2014 | No                 | 10.18140/FLX/1440130 |
| BR-Sa1 | -2.85667   | -54.95889  | EBF               | 2002-2011 | No                 | 10.18140/FLX/1440032 |
| BR-Sa3 | -3.01803   | -54.97144  | EBF               | 2000-2004 | No                 | 10.18140/FLX/1440033 |
| CA-Gro | 48.2167    | -82.1556   | MF                | 2003-2014 | Yes                | 10.18140/FLX/1440034 |
| CA-Man | 55.87962   | -98.48081  | ENF               | 1994-2008 | No                 | 10.18140/FLX/1440035 |
| CA-NS1 | 55.87917   | -98.48389  | ENF               | 2001-2005 | Yes                | 10.18140/FLX/1440036 |
| CA-NS2 | 55.90583   | -98.52472  | ENF               | 2001-2005 | Yes                | 10.18140/FLX/1440037 |
| CA-NS3 | 55.91167   | -98.38222  | ENF               | 2001-2005 | Yes                | 10.18140/FLX/1440038 |
| CA-NS4 | 55.91437   | -98.380645 | ENF               | 2002-2005 | Yes                | 10.18140/FLX/1440039 |
| CA-NS5 | 55.86306   | -98.485    | ENF               | 2001-2005 | Yes                | 10.18140/FLX/1440040 |
| CA-NS6 | 55.91667   | -98.96444  | OSH               | 2001-2005 | No                 | 10.18140/FLX/1440041 |
| CA-NS7 | 56.63583   | -99.94833  | OSH               | 2002-2005 | No                 | 10.18140/FLX/1440042 |
| CA-Oas | 53.62889   | -106.19779 | DBF               | 1996-2010 | Yes                | 10.18140/FLX/1440043 |
| CA-Obs | 53.98717   | -105.11779 | ENF               | 1997-2010 | Yes                | 10.18140/FLX/1440044 |
| CA-Qfo | 49.6925    | -74.34206  | ENF               | 2003-2010 | Yes                | 10.18140/FLX/1440045 |
| CA-SF1 | 54.48503   | -105.81757 | ENF               | 2003-2006 | No                 | 10.18140/FLX/1440046 |
| CA-SF2 | 54.25392   | -105.8775  | ENF               | 2001-2005 | Yes                | 10.18140/FLX/1440047 |
| CA-SF3 | 54.09156   | -106.00526 | OSH               | 2001-2006 | No                 | 10.18140/FLX/1440048 |
| CA-TP1 | 42.6609361 | -80.559519 | ENF               | 2002-2014 | No                 | 10.18140/FLX/1440050 |
| CA-TP2 | 42.7744194 | -80.458775 | ENF               | 2002-2007 | No                 | 10.18140/FLX/1440051 |
| CA-TP3 | 42.7068111 | -80.348314 | ENF               | 2002-2014 | No                 | 10.18140/FLX/1440052 |
| CA-TP4 | 42.710161  | -80.357376 | ENF               | 2002-2014 | Yes                | 10.18140/FLX/1440053 |
| CA-TPD | 42.635328  | -80.557731 | DBF               | 2012-2014 | Yes                | 10.18140/FLX/1440112 |
| CG-Tch | -4.28917   | 11.65642   | SAV               | 2006-2009 | No                 | 10.18140/FLX/1440142 |
| CH-Cha | 47.21022   | 8.41044    | GRA               | 2005-2014 | No                 | 10.18140/FLX/1440131 |
| CH-Dav | 46.81533   | 9.85591    | ENF               | 1997-2014 | No                 | 10.18140/FLX/1440132 |

|        |          |           |     |           |     |                      |
|--------|----------|-----------|-----|-----------|-----|----------------------|
| CH-Fru | 47.11583 | 8.53778   | GRA | 2005-2014 | No  | 10.18140/FLX/1440133 |
| CH-Lae | 47.47833 | 8.36439   | MF  | 2004-2014 | No  | 10.18140/FLX/1440134 |
| CH-Oe1 | 47.28583 | 7.73194   | GRA | 2002-2008 | No  | 10.18140/FLX/1440135 |
| CH-Oe2 | 47.28642 | 7.73375   | CRO | 2004-2014 | No  | 10.18140/FLX/1440136 |
| CN-Cha | 42.4025  | 128.0958  | MF  | 2003-2005 | No  | 10.18140/FLX/1440137 |
| CN-Cng | 44.5934  | 123.5092  | GRA | 2007-2010 | Yes | 10.18140/FLX/1440209 |
| CN-Dan | 30.4978  | 91.0664   | GRA | 2004-2005 | No  | 10.18140/FLX/1440138 |
| CN-Din | 23.1733  | 112.5361  | EBF | 2003-2005 | No  | 10.18140/FLX/1440139 |
| CN-Du2 | 42.0467  | 116.2836  | GRA | 2006-2008 | Yes | 10.18140/FLX/1440140 |
| CN-Du3 | 42.0551  | 116.2809  | GRA | 2009-2010 | Yes | 10.18140/FLX/1440210 |
| CN-Ha2 | 37.6086  | 101.3269  | WET | 2003-2005 | No  | 10.18140/FLX/1440211 |
| CN-HaM | 37.37    | 101.18    | GRA | 2002-2004 | Yes | 10.18140/FLX/1440190 |
| CN-Qia | 26.7414  | 115.0581  | ENF | 2003-2005 | No  | 10.18140/FLX/1440141 |
| CN-Sw2 | 41.7902  | 111.8971  | GRA | 2010-2012 | No  | 10.18140/FLX/1440212 |
| CZ-BK1 | 49.50208 | 18.53688  | ENF | 2004-2014 | No  | 10.18140/FLX/1440143 |
| CZ-BK2 | 49.49443 | 18.54285  | GRA | 2004-2012 | No  | 10.18140/FLX/1440144 |
| CZ-wet | 49.02465 | 14.77035  | WET | 2006-2014 | Yes | 10.18140/FLX/1440145 |
| DE-Akm | 53.86617 | 13.68342  | WET | 2009-2014 | No  | 10.18140/FLX/1440213 |
| DE-Geb | 51.09973 | 10.91463  | CRO | 2001-2014 | No  | 10.18140/FLX/1440146 |
| DE-Gri | 50.95004 | 13.51259  | GRA | 2004-2014 | No  | 10.18140/FLX/1440147 |
| DE-Hai | 51.07921 | 10.45217  | DBF | 2000-2012 | Yes | 10.18140/FLX/1440148 |
| DE-Kli | 50.89306 | 13.52238  | CRO | 2004-2014 | No  | 10.18140/FLX/1440149 |
| DE-Lkb | 49.09962 | 13.30467  | ENF | 2009-2013 | No  | 10.18140/FLX/1440214 |
| DE-Lnf | 51.32822 | 10.3678   | DBF | 2002-2012 | Yes | 10.18140/FLX/1440150 |
| DE-Obe | 50.78666 | 13.72129  | ENF | 2008-2014 | No  | 10.18140/FLX/1440151 |
| DE-RuR | 50.62191 | 6.30413   | GRA | 2011-2014 | No  | 10.18140/FLX/1440215 |
| DE-RuS | 50.86591 | 6.44714   | CRO | 2011-2014 | No  | 10.18140/FLX/1440216 |
| DE-Seh | 50.87062 | 6.44965   | CRO | 2007-2010 | No  | 10.18140/FLX/1440217 |
| DE-SfN | 47.80639 | 11.3275   | WET | 2012-2014 | Yes | 10.18140/FLX/1440219 |
| DE-Spw | 51.89225 | 14.03369  | WET | 2010-2014 | Yes | 10.18140/FLX/1440220 |
| DE-Tha | 50.96256 | 13.56515  | ENF | 1996-2014 | Yes | 10.18140/FLX/1440152 |
| DE-Zrk | 53.87594 | 12.88901  | WET | 2013-2014 | Yes | 10.18140/FLX/1440221 |
| DK-Eng | 55.69053 | 12.19175  | GRA | 2005-2008 | No  | 10.18140/FLX/1440153 |
| DK-Fou | 56.4842  | 9.58722   | CRO | 2005-2005 | No  | 10.18140/FLX/1440154 |
| DK-Sor | 55.48587 | 11.64464  | DBF | 1996-2014 | Yes | 10.18140/FLX/1440155 |
| ES-Amo | 36.83361 | -2.25232  | OSH | 2007-2012 | No  | 10.18140/FLX/1440156 |
| ES-LgS | 37.09794 | -2.96583  | OSH | 2007-2009 | No  | 10.18140/FLX/1440225 |
| ES-LJu | 36.92659 | -2.75212  | OSH | 2004-2013 | No  | 10.18140/FLX/1440157 |
| ES-Ln2 | 36.9695  | -3.47582  | OSH | 2009-2009 | No  | 10.18140/FLX/1440226 |
| FI-Hyy | 61.84741 | 24.29477  | ENF | 1996-2014 | Yes | 10.18140/FLX/1440158 |
| FI-Jok | 60.8986  | 23.51345  | CRO | 2000-2003 | No  | 10.18140/FLX/1440159 |
| FI-Let | 60.64183 | 23.95952  | ENF | 2009-2012 | Yes | 10.18140/FLX/1440227 |
| FI-Lom | 67.99724 | 24.20918  | WET | 2007-2009 | Yes | 10.18140/FLX/1440228 |
| FI-Sod | 67.36239 | 26.63859  | ENF | 2001-2014 | Yes | 10.18140/FLX/1440160 |
| FR-Fon | 48.47636 | 2.7801    | DBF | 2005-2014 | Yes | 10.18140/FLX/1440161 |
| FR-Gri | 48.84422 | 1.95191   | CRO | 2004-2014 | No  | 10.18140/FLX/1440162 |
| FR-LBr | 44.71711 | -0.7693   | ENF | 1996-2008 | No  | 10.18140/FLX/1440163 |
| FR-Pue | 43.7413  | 3.5957    | EBF | 2000-2014 | No  | 10.18140/FLX/1440164 |
| GF-Guy | 5.27877  | -52.92486 | EBF | 2004-2014 | No  | 10.18140/FLX/1440165 |
| GH-Ank | 5.26854  | -2.69421  | EBF | 2011-2014 | No  | 10.18140/FLX/1440229 |
| GL-NuF | 64.13083 | -51.38611 | WET | 2008-2014 | No  | 10.18140/FLX/1440222 |
| GL-ZaF | 74.48143 | -20.55452 | WET | 2008-2011 | No  | 10.18140/FLX/1440223 |
| GL-ZaH | 74.47328 | -20.5503  | GRA | 2000-2014 | No  | 10.18140/FLX/1440224 |
| IT-BCi | 40.52375 | 14.95744  | CRO | 2004-2014 | No  | 10.18140/FLX/1440166 |
| IT-CA1 | 42.38041 | 12.02656  | DBF | 2011-2014 | No  | 10.18140/FLX/1440230 |
| IT-CA2 | 42.37722 | 12.02604  | CRO | 2011-2014 | No  | 10.18140/FLX/1440231 |

|        |           |            |     |           |     |                      |
|--------|-----------|------------|-----|-----------|-----|----------------------|
| IT-CA3 | 42.38     | 12.0222    | DBF | 2011-2014 | No  | 10.18140/FLX/1440232 |
| IT-Col | 41.84936  | 13.58814   | DBF | 1996-2014 | Yes | 10.18140/FLX/1440167 |
| IT-Cp2 | 41.70427  | 12.35729   | EBF | 2012-2014 | No  | 10.18140/FLX/1440233 |
| IT-Cpz | 41.70525  | 12.37611   | EBF | 1997-2009 | No  | 10.18140/FLX/1440168 |
| IT-Isp | 45.81264  | 8.63358    | DBF | 2013-2014 | Yes | 10.18140/FLX/1440234 |
| IT-La2 | 45.9542   | 11.2853    | ENF | 2000-2002 | No  | 10.18140/FLX/1440235 |
| IT-Lav | 45.9562   | 11.28132   | ENF | 2003-2014 | No  | 10.18140/FLX/1440169 |
| IT-MBo | 46.01468  | 11.04583   | GRA | 2003-2013 | Yes | 10.18140/FLX/1440170 |
| IT-Noe | 40.60618  | 8.15169    | CSH | 2004-2014 | No  | 10.18140/FLX/1440171 |
| IT-PT1 | 45.20087  | 9.06104    | DBF | 2002-2004 | Yes | 10.18140/FLX/1440172 |
| IT-Ren | 46.58686  | 11.43369   | ENF | 1998-2013 | No  | 10.18140/FLX/1440173 |
| IT-Ro1 | 42.40812  | 11.93001   | DBF | 2000-2008 | Yes | 10.18140/FLX/1440174 |
| IT-Ro2 | 42.39026  | 11.92093   | DBF | 2002-2012 | No  | 10.18140/FLX/1440175 |
| IT-SR2 | 43.73202  | 10.29091   | ENF | 2013-2014 | No  | 10.18140/FLX/1440236 |
| IT-SRo | 43.72786  | 10.28444   | ENF | 1999-2012 | No  | 10.18140/FLX/1440176 |
| IT-Tor | 45.84444  | 7.57806    | GRA | 2008-2014 | Yes | 10.18140/FLX/1440237 |
| JP-MBF | 44.3869   | 142.3186   | DBF | 2003-2005 | Yes | 10.18140/FLX/1440238 |
| JP-SMF | 35.2617   | 137.0788   | MF  | 2002-2006 | No  | 10.18140/FLX/1440239 |
| MY-PSO | 2.973     | 102.3062   | EBF | 2003-2009 | No  | 10.18140/FLX/1440240 |
| NL-Hor | 52.24035  | 5.0713     | GRA | 2004-2011 | Yes | 10.18140/FLX/1440177 |
| NL-Loo | 52.16658  | 5.74356    | ENF | 1996-2014 | No  | 10.18140/FLX/1440178 |
| PA-SPn | 9.31814   | -79.6346   | DBF | 2007-2009 | No  | 10.18140/FLX/1440180 |
| PA-SPs | 9.31378   | -79.63143  | GRA | 2007-2009 | No  | 10.18140/FLX/1440179 |
| RU-Che | 68.61304  | 161.34143  | WET | 2002-2005 | Yes | 10.18140/FLX/1440181 |
| RU-Cok | 70.82914  | 147.49428  | OSH | 2003-2014 | No  | 10.18140/FLX/1440182 |
| RU-Fyo | 56.46153  | 32.92208   | ENF | 1998-2014 | No  | 10.18140/FLX/1440183 |
| RU-Ha1 | 54.72517  | 90.00215   | GRA | 2002-2004 | Yes | 10.18140/FLX/1440184 |
| SD-Dem | 13.2829   | 30.4783    | SAV | 2005-2009 | No  | 10.18140/FLX/1440186 |
| SJ-Adv | 78.186    | 15.923     | WET | 2011-2014 | No  | 10.18140/FLX/1440241 |
| SJ-Blv | 78.92163  | 11.83109   | SNO | 2008-2009 | No  | 10.18140/FLX/1440242 |
| SN-Dhr | 15.40278  | -15.43222  | SAV | 2010-2013 | No  | 10.18140/FLX/1440246 |
| US-AR1 | 36.4267   | -99.42     | GRA | 2009-2012 | No  | 10.18140/FLX/1440103 |
| US-AR2 | 36.6358   | -99.5975   | GRA | 2009-2012 | No  | 10.18140/FLX/1440104 |
| US-ARb | 35.5497   | -98.0402   | GRA | 2005-2006 | Yes | 10.18140/FLX/1440064 |
| US-ARc | 35.54649  | -98.04     | GRA | 2005-2006 | Yes | 10.18140/FLX/1440065 |
| US-ARM | 36.6058   | -97.4888   | CRO | 2003-2012 | No  | 10.18140/FLX/1440066 |
| US-Atq | 70.4696   | -157.4089  | WET | 2003-2008 | No  | 10.18140/FLX/1440067 |
| US-Blo | 38.8953   | -120.6328  | ENF | 1997-2007 | No  | 10.18140/FLX/1440068 |
| US-Cop | 38.09     | -109.39    | GRA | 2001-2007 | No  | 10.18140/FLX/1440100 |
| US-CRT | 41.628495 | -83.347086 | CRO | 2011-2013 | No  | 10.18140/FLX/1440117 |
| US-GBT | 41.36579  | -106.2397  | ENF | 1999-2006 | Yes | 10.18140/FLX/1440118 |
| US-GLE | 41.36653  | -106.2399  | ENF | 2004-2014 | Yes | 10.18140/FLX/1440069 |
| US-Goo | 34.2547   | -89.8735   | GRA | 2002-2006 | No  | 10.18140/FLX/1440070 |
| US-Ha1 | 42.5378   | -72.1715   | DBF | 1991-2012 | Yes | 10.18140/FLX/1440071 |
| US-IB2 | 41.84062  | -88.24103  | GRA | 2004-2011 | Yes | 10.18140/FLX/1440072 |
| US-Ivo | 68.4865   | -155.7503  | WET | 2004-2007 | Yes | 10.18140/FLX/1440073 |
| US-KS1 | 28.4583   | -80.6709   | ENF | 2002-2002 | No  | 10.18140/FLX/1440074 |
| US-KS2 | 28.6086   | -80.6715   | CSH | 2003-2006 | No  | 10.18140/FLX/1440075 |
| US-Lin | 36.3566   | -119.8423  | CRO | 2009-2010 | No  | 10.18140/FLX/1440107 |
| US-Los | 46.0827   | -89.9792   | WET | 2000-2014 | Yes | 10.18140/FLX/1440076 |
| US-LWW | 34.9604   | -97.9789   | GRA | 1997-1998 | No  | 10.18140/FLX/1440077 |
| US-Me1 | 44.5794   | -121.5     | ENF | 2004-2005 | No  | 10.18140/FLX/1440078 |
| US-Me2 | 44.4523   | -121.5574  | ENF | 2002-2014 | No  | 10.18140/FLX/1440079 |
| US-Me3 | 44.3154   | -121.6078  | ENF | 2004-2009 | No  | 10.18140/FLX/1440080 |
| US-Me4 | 44.4992   | -121.6224  | ENF | 1996-2000 | No  | 10.18140/FLX/1440081 |
| US-Me5 | 44.43719  | -121.56676 | ENF | 2000-2002 | No  | 10.18140/FLX/1440082 |

|        |            |            |     |           |     |                      |
|--------|------------|------------|-----|-----------|-----|----------------------|
| US-Me6 | 44.3232842 | -121.6078  | ENF | 2010-2014 | No  | 10.18140/FLX/1440099 |
| US-MMS | 39.3232    | -86.4131   | DBF | 1999-2014 | Yes | 10.18140/FLX/1440083 |
| US-Myb | 38.049861  | -121.76498 | WET | 2010-2014 | No  | 10.18140/FLX/1440105 |
| US-Ne1 | 41.16506   | -96.47664  | CRO | 2001-2013 | No  | 10.18140/FLX/1440084 |
| US-Ne2 | 41.16487   | -96.4701   | CRO | 2001-2013 | No  | 10.18140/FLX/1440085 |
| US-Ne3 | 41.17967   | -96.43965  | CRO | 2001-2013 | No  | 10.18140/FLX/1440086 |
| US-NR1 | 40.0329    | -105.5464  | ENF | 1998-2014 | Yes | 10.18140/FLX/1440087 |
| US-Oho | 41.5545    | -83.8438   | DBF | 2004-2013 | Yes | 10.18140/FLX/1440088 |
| US-ORv | 40.0201    | -83.0183   | WET | 2011-2011 | No  | 10.18140/FLX/1440102 |
| US-PFa | 45.9459    | -90.2723   | MF  | 1995-2014 | No  | 10.18140/FLX/1440089 |
| US-Prr | 65.12367   | -147.48756 | ENF | 2010-2014 | Yes | 10.18140/FLX/1440113 |
| US-SRC | 31.9083    | -110.8395  | MF  | 2008-2014 | No  | 10.18140/FLX/1440098 |
| US-SRG | 31.789379  | -110.82768 | GRA | 2008-2014 | No  | 10.18140/FLX/1440114 |
| US-SRM | 31.8214    | -110.8661  | WSA | 2004-2014 | No  | 10.18140/FLX/1440090 |
| US-Sta | 41.3966    | -106.8024  | OSH | 2005-2009 | No  | 10.18140/FLX/1440115 |
| US-Syv | 46.242     | -89.3477   | MF  | 2001-2014 | No  | 10.18140/FLX/1440091 |
| US-Ton | 38.4316    | -120.96598 | WSA | 2001-2014 | No  | 10.18140/FLX/1440092 |
| US-Tw1 | 38.1074    | -121.6469  | WET | 2012-2014 | No  | 10.18140/FLX/1440108 |
| US-Tw2 | 38.1047    | -121.6433  | CRO | 2012-2013 | No  | 10.18140/FLX/1440109 |
| US-Tw3 | 38.1159    | -121.6467  | CRO | 2013-2014 | No  | 10.18140/FLX/1440110 |
| US-Tw4 | 38.10298   | -121.6414  | WET | 2013-2014 | No  | 10.18140/FLX/1440111 |
| US-Twt | 38.1087204 | -121.6531  | CRO | 2009-2014 | No  | 10.18140/FLX/1440106 |
| US-UMB | 45.5598    | -84.7138   | DBF | 2000-2014 | Yes | 10.18140/FLX/1440093 |
| US-UMd | 45.5625    | -84.6975   | DBF | 2007-2014 | Yes | 10.18140/FLX/1440101 |
| US-Var | 38.4133    | -120.9507  | GRA | 2000-2014 | Yes | 10.18140/FLX/1440094 |
| US-WCr | 45.8059    | -90.0799   | DBF | 1999-2014 | Yes | 10.18140/FLX/1440095 |
| US-Whs | 31.7438    | -110.0522  | OSH | 2007-2014 | No  | 10.18140/FLX/1440097 |
| US-Wi0 | 46.618778  | -91.081444 | ENF | 2002-2002 | Yes | 10.18140/FLX/1440055 |
| US-Wi1 | 46.730472  | -91.232944 | DBF | 2003-2003 | Yes | 10.18140/FLX/1440054 |
| US-Wi2 | 46.686889  | -91.152833 | ENF | 2003-2003 | No  | 10.18140/FLX/1440056 |
| US-Wi3 | 46.634722  | -91.098667 | DBF | 2002-2004 | Yes | 10.18140/FLX/1440057 |
| US-Wi4 | 46.739333  | -91.16625  | ENF | 2002-2005 | No  | 10.18140/FLX/1440058 |
| US-Wi5 | 46.653083  | -91.085806 | ENF | 2004-2004 | Yes | 10.18140/FLX/1440059 |
| US-Wi6 | 46.624889  | -91.298222 | OSH | 2002-2003 | No  | 10.18140/FLX/1440060 |
| US-Wi7 | 46.649111  | -91.069278 | OSH | 2005-2005 | No  | 10.18140/FLX/1440061 |
| US-Wi8 | 46.722333  | -91.252417 | DBF | 2002-2002 | Yes | 10.18140/FLX/1440062 |
| US-Wi9 | 46.618778  | -91.081444 | ENF | 2004-2005 | No  | 10.18140/FLX/1440063 |
| US-Wkg | 31.7365    | -109.9419  | GRA | 2004-2014 | No  | 10.18140/FLX/1440096 |
| US-WPT | 41.464639  | -82.996157 | WET | 2011-2013 | No  | 10.18140/FLX/1440116 |
| ZM-Mon | -15.4391   | 23.2525    | DBF | 2000-2009 | No  | 10.18140/FLX/1440189 |

240 <sup>a</sup>The land cover classification defined by The International Geosphere–Biosphere Programme

241 (IGBP) (definitions are as in Fig. 1)

242 <sup>b</sup>If the site is C<sub>3</sub>, non-cropland and non-dryland, and demonstrates acceptable model performance

243 ( $R^2 > 0.5$ ) across all three model variants

244 **Supplementary Table 3: Parameter values for temperature dependency functions of  $V_{cmax}$**   
 245 **and  $J_{max}$  (equation 5)**

246

| Parameters | $H_{a,v}$ <sup>a</sup> | $H_{a,j}$ <sup>b</sup> | $S_v$ <sup>c</sup> | $S_j$ <sup>d</sup> | $b_{jv}$ <sup>e</sup> |
|------------|------------------------|------------------------|--------------------|--------------------|-----------------------|
| a          | 1.14                   | 0                      | -0.38              | 0                  | 0                     |
| b          | 0                      | 0                      | 0                  | -0.84              | -0.0375               |
| c          | 0                      | 0                      | 0                  | -0.52              | -0.0202               |
| d          | 42.6                   | 40.71                  | 645.13             | 658.77             | 2.56                  |

247 <sup>a</sup>Activation energy of  $V_{cmax}$

248 <sup>b</sup>Activation energy of  $J_{max}$

249 <sup>c</sup>Entropy term of  $V_{cmax}$

250 <sup>d</sup>Entropy term of  $J_{max}$

251 <sup>e</sup>The ratio of  $J_{max}^{25C}$  to  $V_{cmax}^{25C}$

252 References

253

- 254 1. Farquhar, G. D., von Caemmerer, S. & Berry, J. A. A biochemical model of photosynthetic  
255 CO<sub>2</sub> assimilation in leaves of C<sub>3</sub> species. *Planta* **149**, 78–90 (1980).
- 256 2. Jiang, C. & Ryu, Y. Multi-scale evaluation of global gross primary productivity and  
257 evapotranspiration products derived from Breathing Earth System Simulator (BESS). *Remote*  
258 *Sensing of Environment* **186**, 528–547 (2016).
- 259 3. Ryu, Y. *et al.* Integration of MODIS land and atmosphere products with a coupled-process  
260 model to estimate gross primary productivity and evapotranspiration from 1 km to global  
261 scales. *Global Biogeochemical Cycles* **25**, 1–24 (2011).
- 262 4. Knauer, J., El-Madany, T. S., Zaehle, S. & Migliavacca, M. Bigleaf—An R package for the  
263 calculation of physical and physiological ecosystem properties from eddy covariance data.  
264 *PLoS ONE* **13**, 1–26 (2018).
- 265 5. Baldocchi, D. An analytical solution for coupled leaf photosynthesis and stomatal  
266 conductance models. *Tree Physiology* **14**, 1069–1079 (1994).
- 267 6. Wang, H. *et al.* Towards a universal model for carbon dioxide uptake by plants. *Nature*  
268 *Plants* **3**, 734–741 (2017).
- 269 7. De Pury, D. G. G. & Farquhar, G. D. Simple scaling of photosynthesis from leaves to  
270 canopies without the errors of big-leaf models. *Plant, Cell and Environment* **20**, 537–557  
271 (1997).
- 272 8. Kumarathunge, D. P. *et al.* Acclimation and adaptation components of the temperature  
273 dependence of plant photosynthesis at the global scale. *New Phytologist* **222**, 768–784  
274 (2019).

- 275 9. Li, B. *et al.* BESSv2.0: A satellite-based and coupled-process model for quantifying long-  
276 term global land–atmosphere fluxes. *Remote Sensing of Environment* **295**, 113696 (2023).
- 277 10. Knauer, J. *et al.* Higher global gross primary productivity under future climate with more  
278 advanced representations of photosynthesis. *Sci. Adv.* **9**, eadh9444 (2023).
- 279 11. Verma, S. B. Aerodynamic resistances to transfers of heat, mass and momentum. in  
280 *Estimation of areal evapotranspiration (pp. 13–20)* (Wallingford, UK: International  
281 Association of Hydrological Sciences IAHS Publication No. 177, 1989).
- 282 12. Thom, A. S. Momentum, mass and heat exchange of vegetation. *Q.J Royal Met. Soc.* **98**,  
283 124–134 (1972).
- 284 13. Pastorello, G. *et al.* The FLUXNET2015 dataset and the ONEFlux processing pipeline for  
285 eddy covariance data. *Scientific Data* **7**, 225 (2020).
- 286 14. Chen, J. L., Reynolds, J. F., Harley, P. C. & Tenhunen, J. D. Coordination theory of leaf  
287 nitrogen distribution in a canopy. *Oecologia* **93**, 63–69 (1993).
- 288 15. Maire, V. *et al.* The coordination of leaf photosynthesis links C and N fluxes in C<sub>3</sub> plant  
289 species. *PLoS ONE* **7**, 1–15 (2012).
- 290 16. Stocker, B. D. *et al.* P-model v1.0: An optimality-based light use efficiency model for  
291 simulating ecosystem gross primary production. *Geoscientific Model Development* **13**, 1545–  
292 1581 (2020).
- 293 17. Smith, E. L. The influence of light and carbon dioxide on photosynthesis. *Journal of General*  
294 *Physiology* **20**, 807–830 (1937).
- 295 18. Bernacchi, C. J., Pimentel, C. & Long, S. P. *In vivo* temperature response functions of  
296 parameters required to model RuBP-limited photosynthesis: Modelling RuBP-limited  
297 photosynthesis. *Plant, Cell & Environment* **26**, 1419–1430 (2003).



- 298 19. Prentice, I. C., Dong, N., Gleason, S. M., Maire, V. & Wright, I. J. Balancing the costs of  
299 carbon gain and water transport: Testing a new theoretical framework for plant functional  
300 ecology. *Ecology Letters* **17**, 82–91 (2014).
- 301 20. Bernacchi, C. J., Singsaas, E. L., Pimentel, C., Portis, A. R. & Long, S. P. Improved  
302 temperature response functions for models of Rubisco-limited photosynthesis. *Plant, Cell  
303 and Environment* **24**, 253–259 (2001).
- 304 21. Kattge, J. & Knorr, W. Temperature acclimation in a biochemical model of photosynthesis:  
305 A reanalysis of data from 36 species. *Plant, Cell and Environment* **30**, 1176–1190 (2007).
- 306 22. He, L., Chen, J. M., Pisek, J., Schaaf, C. B. & Strahler, A. H. Global clumping index map  
307 derived from the MODIS BRDF product. *Remote Sensing of Environment* **119**, 118–130  
308 (2012).
- 309 23. Jiang, C., Ryu, Y., Wang, H. & Keenan, T. F. An optimality-based model explains seasonal  
310 variation in C<sub>3</sub> plant photosynthetic capacity. *Global Change Biology* **26**, 6493–6510 (2020).
- 311 24. Luo, X. & Keenan, T. F. Global evidence for the acclimation of ecosystem photosynthesis to  
312 light. *Nature Ecology and Evolution* **4**, 1351–1357 (2020).
- 313 25. Smith, N. G. & Dukes, J. S. Short-term acclimation to warmer temperatures accelerates leaf  
314 carbon exchange processes across plant types. *Global Change Biology* **23**, 4840–4853  
315 (2017).
- 316 26. Zhou, H. *et al.* Large contributions of diffuse radiation to global gross primary productivity  
317 during 1981–2015. *Global Biogeochemical Cycles* **35**, e2021GB006957 (2021).
- 318 27. Lasslop, G. *et al.* Separation of net ecosystem exchange into assimilation and respiration  
319 using a light response curve approach: Critical issues and global evaluation. *Global Change  
320 Biology* **16**, 187–208 (2010).
